# Supplementary material
Source: publisher figshare collection journal article supplement (https://karger.figshare.com/articles/dataset/_/5126227)
Supplement: Supplementary file 2 [file 1]

Archive with 2 entries (2 files):
- 000358603_sm_Karger_OLA.pdf
- 000358603_sm_Suppl_Material.doc
